# Supplementary material for: The preparation of high-quality water-soluble silicon quantum dots and their application in the detection of formaldehyde
Source: Royal Society of Chemistry journal article supplement (doi:10.1039/c6ra24654k), 2016-01-01
Supplement: c6ra24654k1.pdf [file c6ra24654k1.pdf]

*Supplementary Information for*

# **The Preparation of High-Quality Water-soluble Silicon Quantum Dots and Their Application in Detection of Formaldehyde**

Xiaoling Xu, Shiyao Ma, Yan Hu, Xincai Xiao and Dan Zhao\*

*School of Pharmaceutical Sciences South-Central University for*

*Nationalities, Wuhan 430074, P. R. China*

***\*Corresponding Author:***

E-mail address: [wqzhdpai@163.com](mailto:wqzhdpai@163.com) (D. Zhao)

QY Calculations

The QYs of SiQDs were calculated by comparing the integrated PL intensities and absorbance values of the samples (excited at 320 nm), using quinine sulfate dissolved in 0.1 mol/L H<sub>2</sub>SO<sub>4</sub> aqueous solution (refractive index ( $\eta$ ) of 1.33) as the standard (QY = 58%). All samples dissolved in water ( $\eta = 1.33$ ) had absorbance less than 0.1 at 320 nm. The relative QY can be calculated using the below equation:

$$\Phi_X = \Phi_{ST} (\text{Grad}_X / \text{Grad}_{ST}) (\eta_X^2 / \eta_{ST}^2)$$

Where  $\Phi$  is the QY, Grad is the gradient from the plot of integrated fluorescence intensity versus absorbance, and  $\eta$  is the refractive index of the solvent; ST denotes the standard and X denotes the sample.

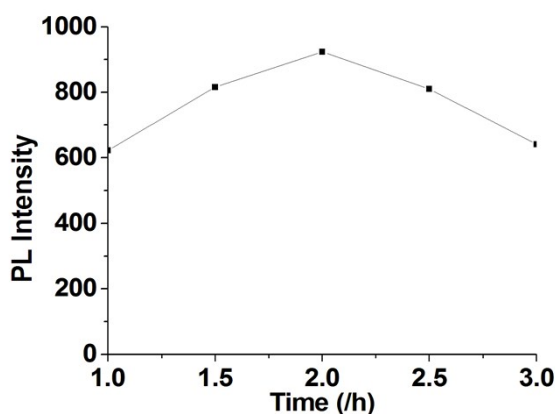

Fig.S1 PL spectra of Si QDs grown at different heating temperature.

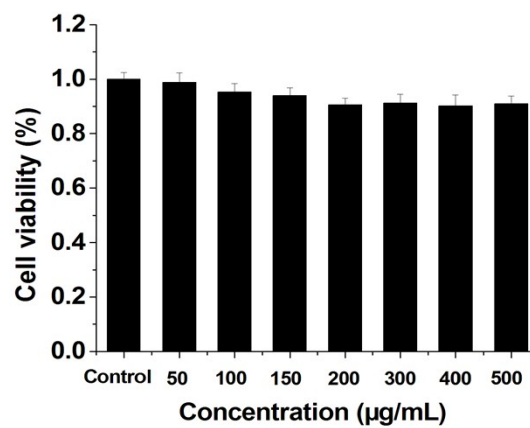

Fig.S2 Cell viability of L-929 cells treated with SiQDs of serial concentrations.

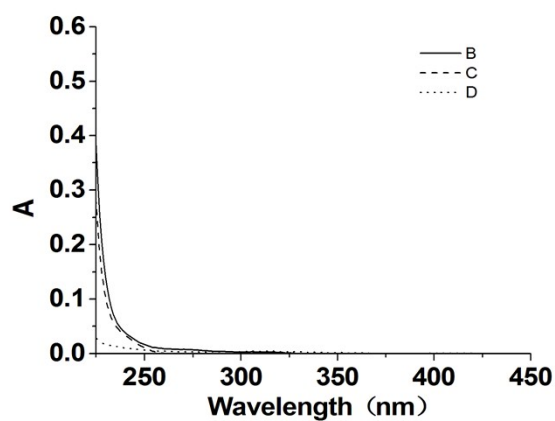

Fig.S3 UV-visible absorption spectra of APTMS, APTES and UPTES.

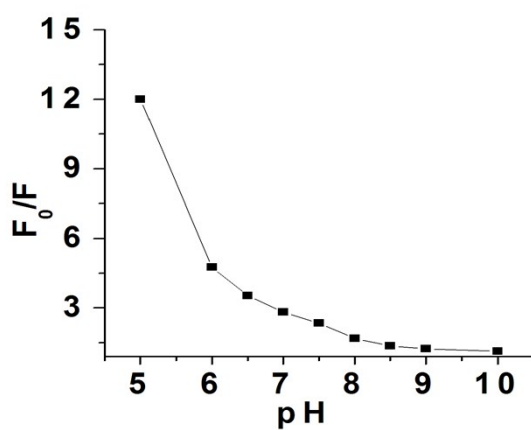

Fig.S4 The quenching degree of Si QDs at different pH values.
